# Supplementary material for: Drosophila tubulin-binding cofactor B is required for microtubule network formation and for cell polarity
Source: PubMed Central journal article supplement — Mol Biol Cell. 2012 Sep 15;23(18):3591–601. doi: 10.1091/mbc.E11-07-0633 (PMC3442407; doi:10.1091/mbc.e11-07-0633), 2012-09-15
Supplement: supp_E11-07-0633_CombinedSupMats.pdf [file supp_E11-07-0633_CombinedSupMats.pdf]

SUPPLEMENTAL INFORMATION

Baffet\_Fig S1

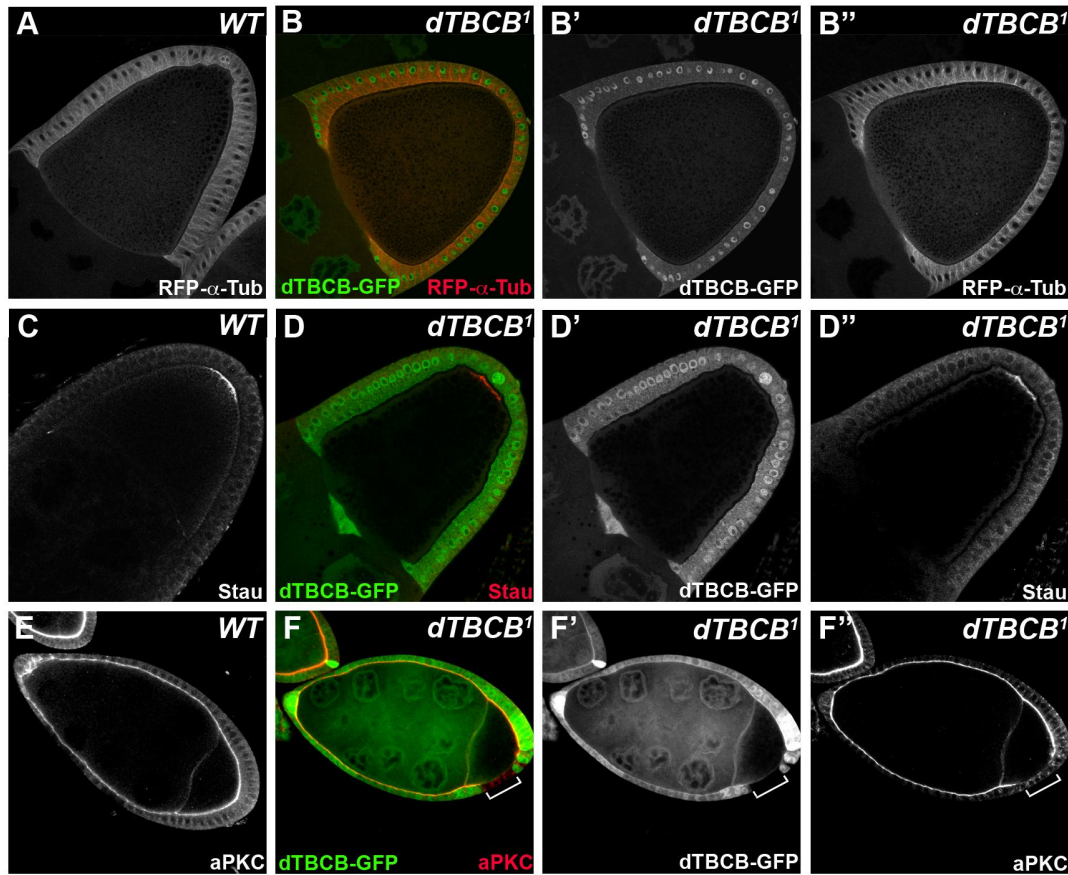

**Fig. S1. Expression of a wild-type dTBCB transgene fused to GFP rescues MT and polarity defects in a *dTBCB*<sup>1</sup> background**

(A-B'') Stage 10 egg chambers, expressing a *Ubi-α-RFP-Tubulin* transgene and fixed to visualize the follicle cell MT network. Chambers are oriented with anterior to the left. (A) Wild-type. (B-B'') *dTBCB*<sup>1</sup> mutant egg chamber expressing *Ubi-dTBCB-GFP* transgene. In (B'') the rescued follicle cells show a normal MT network compared to the control (A).

(C-D'') Stage 10 egg chambers, immunostained for Staufen (Stau) protein. (C) Wild-type.

(D-D'') *dTBCB<sup>l</sup>* mutant egg chamber expressing *Ubi-dTBCB-GFP* transgene. In (D''), the rescued oocyte shows a normal posterior Stau crescent, compared to the control (C).

(E-F'') Stage 8 egg chambers, immunostained for aPKC. (E) Wild-type. (F-F'') *dTBCB<sup>l</sup>* mutant egg chamber expressing *Ubi-dTBCB-GFP* transgene. In (F''), the rescued follicle cells show a normal apical aPKC staining compare to the control (E). In rare circumstances *dTBCB-GFP* expression is incomplete (white bracket), in such cases the rescue of aPKC localization failed to occur.

## Baffet\_ Fig S2

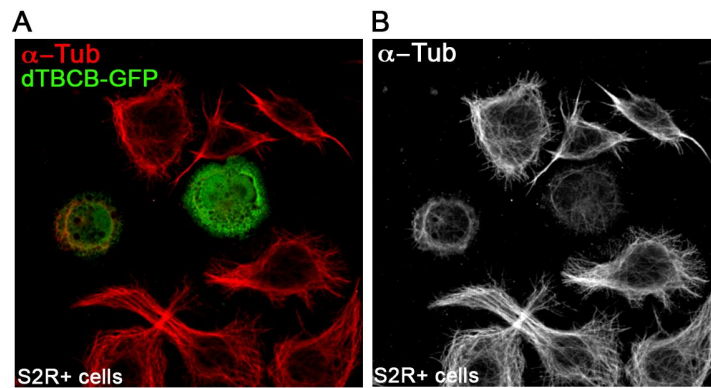

**Fig. S2. Overexpression of dTBCB-GFP in S2R+ *Drosophila* cells led to MT depolymerization**

(A-B) Strong overexpression of the *Ubi-dTBCB-GFP* transgene (green) in S2R+ cells triggers MT network destabilization. MTs were detected with an  $\alpha$ -Tubulin antibody, red in (A) and white in (B).

### Baffet\_Fig S3

**A**

|                                                                | Hatched eggs | n   |
|----------------------------------------------------------------|--------------|-----|
| <i>Wild-type</i>                                               | 95%          | 250 |
| <i>dTBCB</i> <sup>1/+</sup>                                    | 96%          | 260 |
| <i>α-Tub 84B</i> <sup>5/+</sup>                                | 75%          | 118 |
| <i>dTBCB</i> <sup>1/+</sup><br><i>α-Tub 84B</i> <sup>5/+</sup> | 39%          | 123 |

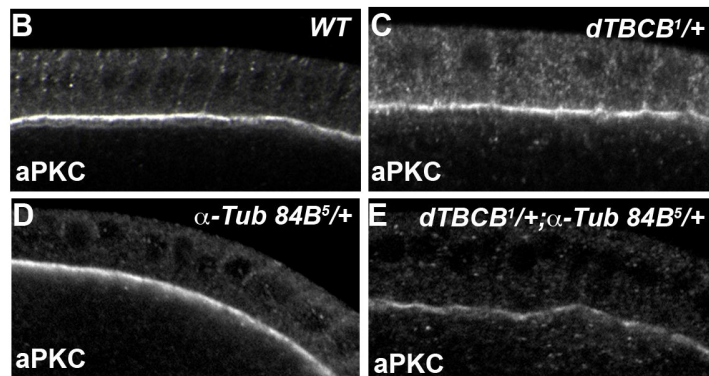

**F**

|                                                                | Wild-type aPKC localisation | n   |
|----------------------------------------------------------------|-----------------------------|-----|
| <i>Wild-type</i>                                               | 100%                        | 35  |
| <i>dTBCB</i> <sup>1/+</sup>                                    | 92%                         | 65  |
| <i>α-Tub 84B</i> <sup>5/+</sup>                                | 90%                         | 52  |
| <i>dTBCB</i> <sup>1/+</sup><br><i>α-Tub 84B</i> <sup>5/+</sup> | 30%                         | 100 |

### Fig. S3. Genetic interaction between *dTBCB* and *α-Tubulin 84B*

(A) Trans heterozygous flies for *dTBCB*<sup>1</sup> and *α-Tubulin 84B*<sup>5</sup> mutations display a significant reduced fertility compared to wild-type and single heterozygous mutants.

(B-F) Follicle cells from stage 9 egg chambers, immunostained for aPKC. Trans heterozygous follicular cells for *dTBCB*<sup>1</sup> and *α-Tubulin 84B*<sup>5</sup> mutations can display a reduced apical aPKC distribution compared to wild-type and single heterozygous mutant cells (B-E). In F, percentages of chambers with localized aPKC are indicated for each genetic background.

| <b>Sup Table 1. Quantification of MT phenotype in germline cysts during oogenesis</b>       |           |         |         |         |     |
|---------------------------------------------------------------------------------------------|-----------|---------|---------|---------|-----|
|                                                                                             | Germarium | St2-St3 | St4-St6 | St7-St8 | St9 |
| % of fluorescence diminution between <i>dTBCB</i> <sup>1</sup> and wild-type germline cysts | 43%       | 42%     | 43%     | 42%     | 53% |
| Number of <i>dTBCB</i> <sup>1</sup> cysts analyzed                                          | 46        | 15      | 17      | 13      | 4   |
| Number of wild-type cysts analyzed                                                          | 53        | 10      | 10      | 14      | 4   |
